# Supplementary material for: Dioxygenase-catalysed oxidation of disubstituted benzene substrates: benzylic monohydroxylation versus aryl cis-dihydroxylation and the meta effect
Source: Royal Society of Chemistry journal article supplement (doi:10.1039/b608417f), 2006-01-01
Supplement: b608417f.pdf [file b608417f.pdf]

**Dioxygenase-catalysed oxidation of disubstituted benzene substrates: benzylic monohydroxylation *versus* aryl *cis*-dihydroxylation and the *meta* effect**

**Derek R. Boyd,<sup>\*a,b</sup> Narain D. Sharma,<sup>a,b</sup> Nigel I. Bowers,<sup>a</sup> Howard Dalton,<sup>c</sup> Mark D Garrett,<sup>a</sup> John S. Harrison<sup>a</sup> and Gary N. Sheldrake<sup>\*a</sup>**

<sup>a</sup> School of Chemistry and Chemical Engineering, The Queen's University of Belfast, Belfast, UK BT9 5AG. E-mail: dr.boyd@qub.ac.uk; Tel: +44 28 9097 4421

<sup>b</sup> CenTACat, The Queen's University of Belfast, Belfast, UK BT9 5AG

<sup>c</sup> Department of Biological Sciences, University of Warwick, Coventry, UK CV4 7AL

**Table S1**  $^1\text{H-NMR}$  spectroscopic data for *cis*-dihydrodiol metabolites **2B–12B**, **14B–17B** and **19B**

| <i>cis</i> -Dihydrodiol <sup>a</sup> |      |                        | Ring protons          |                       |                       |                       | Exocyclic protons     |                                                |                    |                       |
|--------------------------------------|------|------------------------|-----------------------|-----------------------|-----------------------|-----------------------|-----------------------|------------------------------------------------|--------------------|-----------------------|
| R                                    | R'   |                        | H-1                   | H-2                   | H-4                   | H-5                   | H-6                   | CH <sub>2</sub> CH <sub>2</sub>                | CH <sub>2</sub> Me | Me                    |
| Me                                   | 4-F  | <b>2B</b>              | 4.35, d, <i>J</i> 5.8 | 4.05, d, <i>J</i> 5.8 |                       | 5.77, m               | m, 5.77               | 2.10, m<br>2.31, m                             |                    | 1.03, t, <i>J</i> 7.6 |
| Me                                   | 4-Cl | <b>3B</b>              | 4.29, m               | 4.04, d, <i>J</i> 5.8 |                       | 5.82, m               | m, 5.29               | 2.24, q, <i>J</i> 7.6<br>2.42, q, <i>J</i> 7.6 |                    | 1.03, t, <i>J</i> 7.6 |
| Me                                   | 4-Br | <b>4B</b>              | 4.29, d, <i>J</i> 5.8 | 4.05, d, <i>J</i> 5.8 |                       | 5.96, d, <i>J</i> 9.8 | d, 5.65, <i>J</i> 9.8 | 2.24, q, <i>J</i> 7.5<br>2.40, q, <i>J</i> 7.5 |                    | 1.04, t, <i>J</i> 7.5 |
| Me                                   | 4-I  | <b>5B</b>              | 4.33, m               | 4.10, d, <i>J</i> 5.7 |                       | 6.22, d, <i>J</i> 9.8 | m, 5.56               | 2.41, m                                        |                    | 1.08, m               |
| Me                                   | 6-F  | <b>6B<sup>b</sup></b>  | 4.22, m               | 4.22, m               | 5.48, m               | 5.48, m               |                       | 2.14, q, <i>J</i> 7.4                          |                    | 0.97, t, <i>J</i> 7.4 |
| Me                                   | 6-Cl | <b>7B</b>              | 4.29, d, <i>J</i> 6.2 | 4.27, d, <i>J</i> 6.2 | 6.09, d, <i>J</i> 6.1 | 5.64, d, <i>J</i> 6.1 |                       | 2.29, q, <i>J</i> 7.4                          |                    | 1.10, t, <i>J</i> 7.4 |
| Me                                   | 6-Br | <b>8B</b>              | 4.25, d, <i>J</i> 6.0 | 4.21, d, <i>J</i> 6.0 | 6.26, d, <i>J</i> 6.1 | 5.50, d, <i>J</i> 6.1 |                       | 2.17, q, <i>J</i> 7.3                          |                    | 1.02, t, <i>J</i> 7.3 |
| Me                                   | 6-I  | <b>9B</b>              | 4.27, d, <i>J</i> 5.7 | 4.22, d, <i>J</i> 5.7 | 6.63, d, <i>J</i> 5.9 | 5.45, d, <i>J</i> 5.9 |                       | 2.24, q, <i>J</i> 7.0                          |                    | 1.09, t, <i>J</i> 7.0 |
| Me                                   | 5-F  | <b>10B</b>             | 4.27, d, <i>J</i> 6.0 | 4.18, d, <i>J</i> 6.0 | 5.28, m               |                       | m, 5.55               | 2.26, q, <i>J</i> 7.3                          |                    | 1.04, t, <i>J</i> 7.3 |
| Me                                   | 5-Cl | <b>11B</b>             | 4.31, m               | 4.31, m               | 5.63, m               |                       | m, 5.85               | 2.31, q, <i>J</i> 7.4                          |                    | 1.11, t, <i>J</i> 7.4 |
| Me                                   | 5-Br | <b>12B</b>             | 4.27, m               | 4.05, m               | 5.69, m               |                       | m, 6.02               | 2.32, q, <i>J</i> 7.3                          |                    | 1.11, t, <i>J</i> 7.3 |
| Et                                   | 4-F  | <b>14B</b>             | 4.36, d, <i>J</i> 5.7 | 4.10, m               |                       | 5.85, m               | m, 5.85               | 2.13, m<br>2.34, m                             | 1.5, m             | 0.95, t, <i>J</i> 7.4 |
| Et                                   | 6-F  | <b>15B<sup>b</sup></b> | 4.34, d, <i>J</i> 6.2 | 4.31, d, <i>J</i> 6.2 | 5.53, d, <i>J</i> 6.0 | 5.58, d, <i>J</i> 6.0 |                       | 2.18, m<br>2.34, m                             | 1.51, m            | 0.94, t, <i>J</i> 7.4 |
| Et                                   | 6-Cl | <b>16B</b>             | 4.27, m               | 4.27, m               |                       | 5.64, d, <i>J</i> 6.0 | d, 6.08, <i>J</i> 6.0 | 2.22, m                                        | 1.52, m            | 0.94, t, <i>J</i> 7.4 |
| Et                                   | 6-Br | <b>17B</b>             | 4.30, d, <i>J</i> 5.5 | 4.26, d, <i>J</i> 5.5 |                       | 5.58, d, <i>J</i> 6.0 | d, 6.32, <i>J</i> 6.0 | 2.18, m                                        | 1.50, m            | 0.94, t, <i>J</i> 7.4 |
| Et                                   | 5-Cl | <b>19B<sup>b</sup></b> | 4.22, m               | 4.13, d, <i>J</i> 5.6 | 5.82, m               |                       | d 6.21, <i>J</i> 4.2  | 2.12, m                                        | 1.48, m            | 0.93, t, <i>J</i> 7.3 |

<sup>a</sup> All  $^1\text{H-NMR}$  spectra were recorded in  $\text{CDCl}_3$  solution at 500 MHz except where indicated. Coupling constants, *J*, recorded in Hz.

<sup>b</sup>  $^1\text{H-NMR}$  spectrum recorded at 300 MHz.
